# Clonidine Improved Laboratory-Measured Decision-Making Performance in Abstinent Heroin Addicts

Xiao-Li Zhang<sup>1</sup>, Gui-Bin Wang<sup>1</sup>, Li-Yan Zhao, Li-Li Sun, Jun Wang, Ping Wu, Lin Lu, Jie Shi\*

National Institute on Drug Dependence, Peking University, Beijing, China

## Abstract

**Background:** Impulsivity refers to a wide spectrum of actions characterized by quick and nonplanned reactions to external and internal stimuli, without taking into account the possible negative consequences for the individual or others, and decision-making is one of the biologically dissociated impulsive behaviors. Changes in impulsivity may be associated with norepinephrine. Various populations of drug addicts all performed impulsive decision making, which is a key risk factor in drug dependence and relapse. The present study investigated the effects of clonidine, which decreased norepinephrine release through presynaptic alpha-2 receptor activation, on the impaired decision-making performance in abstinent heroin addicts.

**Methodology/Principal Findings:** Decision-making performance was assessed using the original version of Iowa Gambling Task (IGT). Both heroin addicts and normal controls were randomly assigned to three groups receiving clonidine, 0, 75  $\mu\text{g}$  or 150  $\mu\text{g}$  orally under double blind conditions. Psychiatric symptoms, including anxiety, depression and impulsivity, were rated on standardized scales. Heroin addicts reported higher scores on the Barratt Impulsiveness Scale and exhibited impaired decision-making on the IGT. A single high-dose of clonidine improved the decision-making performance in heroin addicts.

**Conclusions/Significance:** Our results suggest clonidine may have a potential therapeutic role in heroin addicts by improving the impaired impulsive decision-making. The current findings have important implications for behavioral and pharmacological interventions targeting decision-making in heroin addiction.

**Citation:** Zhang X-L, Wang G-B, Zhao L-Y, Sun L-L, Wang J, et al. (2012) Clonidine Improved Laboratory-Measured Decision-Making Performance in Abstinent Heroin Addicts. PLoS ONE 7(1): e29084. doi:10.1371/journal.pone.0029084

**Editor:** Xiang Yang Zhang, Baylor College of Medicine, United States of America

**Received:** August 16, 2011; **Accepted:** November 21, 2011; **Published:** January 23, 2012

**Copyright:** © 2012 Zhang et al. This is an open-access article distributed under the terms of the Creative Commons Attribution License, which permits unrestricted use, distribution, and reproduction in any medium, provided the original author and source are credited.

**Funding:** This work was supported in part by the National Basic Research Program of China (No. 2009CB522000), Natural Science Foundation of Beijing Municipality (No. 7092058) and Natural Science Foundation of China (No. 81000571 and 91132719). The funders had no role in study design, data collection and analysis, decision to publish, or preparation of the manuscript.

**Competing Interests:** The authors have declared that no competing interests exist.

\* E-mail: shijie@bjmu.edu.cn

These authors contributed equally to this work.

## Introduction

The high propensity to relapse is a hallmark feature of drug addiction and a main challenge for treatment strategies. Impulsivity, which refers to behavior performed with little or inadequate forethought, is a key vulnerability factor in drug addiction and risk factor in relapse [1]. Chronic drug abusers showed elevated scores on questionnaires measures of impulsivity [2] and impaired performance on laboratory tasks of impulsivity [3,4].

Impulsivity is a multifactorial construct that can be measured by tasks such as decision-making, response inhibition, and reflective impulsivity [5,6]. The Iowa Gambling Task (IGT) [7] was specifically developed to assess and quantify the decision-making ability by simulating the real-life decision under ambiguous conditions [8]. Converging evidence indicates that decision-making performance is impaired in subjects abusing opiate [9,10], alcohol [11,12], psychostimulants [11,13], and marijuana [14].

Prefrontal cortical (PFC) network plays an important role in gating impulsive actions in a variety of behavior tasks [15,16]. Activation of alpha-1 noradrenergic receptor is associated with

short-term changes in PFC function that are consistent with increased impulsivity [17]. Research in normal subjects found that laboratory-measured impulsivity was increased by acute administration of yohimbine, which augments norepinephrine release by blocking alpha-2 noradrenergic receptors [18]. Our recent study has found that the decision-making was impaired in former heroin addicts up to abstinence for 2 years, and stress can exacerbate an already existing impairment of decision-making, or unmask a latent one [19]. Clonidine may decrease norepinephrine release through presynaptic alpha-2 receptor activation, resulting in decreased levels of norepinephrine metabolites [20]. However, there has been no research about the effects of clonidine on decision-making performance in abstinent heroin addicts.

Thus, our hypothesis was that, at doses that decreased behavioral arousal or activation, clonidine would improve decision-making performance in abstinent heroin addicts. Since 150  $\mu\text{g}$  clonidine can suppress blood pressure [21,22], we also examined the safety and efficacy of this medication at half of the dose (e.g. 75  $\mu\text{g}$ ) in abstinent heroin addicts and hypothesized that the effect of clonidine may be dose-dependent.

**Table 1.** Demographic and clinical characteristics of participants.

| Characteristic                 | Control groups      |                             |                              | Heroin groups       |                             |                              |
|--------------------------------|---------------------|-----------------------------|------------------------------|---------------------|-----------------------------|------------------------------|
|                                | Placebo<br>(n = 20) | 75 µg clonidine<br>(n = 18) | 150 µg clonidine<br>(n = 18) | Placebo<br>(n = 17) | 75 µg clonidine<br>(n = 18) | 150 µg clonidine<br>(n = 18) |
| Age (years)                    | 29.20(4.72)         | 31.33 (7.20)                | 29.83 (5.83)                 | 32.65 (6.71)        | 32.11 (5.86)                | 30.5 (6.29)                  |
| Education (years)              | 11.10(2.40)         | 10.50 (2.12)                | 11.94 (2.36)                 | 10.06 (2.38)        | 10.06 (2.34)                | 9.83 (2.20)                  |
| Duration of heroin use (years) |                     |                             |                              | 7.92 (3.45)         | 7.72 (4.60)                 | 7.00 (4.65)                  |
| Dose used (g/d)                |                     |                             |                              | 0.89 (0.46)         | 0.85 (0.67)                 | 0.83 (0.45)                  |
| Abstinence time (months)       |                     |                             |                              | 5.39 (2.36)         | 5.38 (2.35)                 | 5.20 (2.90)                  |
| HAMA score                     | 2.80 (1.67)         | 2.22 (1.63)                 | 2.56 (3.07)                  | 3.71 (1.76)         | 3.17 (1.65)                 | 3.00 (0.91)                  |
| BDI-II score <sup>a</sup>      | 3.10 (3.80)         | 2.50 (3.20)                 | 3.83 (4.55)                  | 12.9 (5.32)         | 9.67 (5.11)                 | 10.78 (5.99)                 |

Values are expressed as mean (S.D.). No significant differences were found in age, education, and HAMA score across groups. No significant differences were found for heroin abuse characteristics (duration, dose, and abstinence time).

<sup>a</sup>Difference between heroin addicts and normal controls.

doi:10.1371/journal.pone.0029084.t001

## Results

Fifty-three heroin addicts and 56 normal controls were enrolled and completed the study. The demographic, substance abuse characteristics, as well as BDI and HAMA scores of the participants were summarized in Table 1. One-way ANOVA indicated a significant effect of Group on self-report ratings of depression on the BDI-II ( $F_{(5,108)} = 16.38, p < 0.05$ ). The analysis revealed that each subgroup of heroin addicts scored higher on depression compared with controls ( $p < 0.05$ ). No significant differences in age, education and anxiety score were found in the three subgroups of heroin addicts and normal controls. No significant differences were found in drug use characteristics (duration of heroin use and average dose abused) across heroin groups.

### Heroin addicts reported higher impulsivity scores on the BIS-11

Table 2 showed self-reported impulsivity on the BIS-11 in heroin addicts and normal controls. The analysis revealed a significant effect of Group ( $F_{(1,108)} = 54.288, p < 0.05$ ) on self-report ratings of the BIS-II total score, which meant that heroin addicts reported higher scores than normal controls. Significant differences were also found on the subscales motor impulsiveness ( $F_{(1,108)} = 17.789, p < 0.05$ ), attention impulsiveness ( $F_{(1,108)} = 24.77, p < 0.05$ ), and nonplanning impulsiveness ( $F_{(1,108)} = 47.254, p < 0.05$ ). No significant differences were found between the three subgroups of heroin addicts and normal controls in total scores

and subscale scores of self-reported impulsivity on the BIS-II ( $p > 0.05$ ).

### 150 µg clonidine improved the impaired decision-making in heroin addicts

Fig. 1 showed the change of IGT overall net scores  $[(C+D) - (A+B)]$  in heroin addicts and normal controls. The analysis revealed that the heroin group tended to select more disadvantageous cards in the IGT at baseline compared with the control group ( $F_{(1,108)} = 6.09, p < 0.05$ ). No difference was found across the three subgroups in both the control group and heroin group ( $p > 0.05$ ). The analysis revealed a significant effect of Time ( $F_{(1,102)} = 4.495, p < 0.05$ ), a Time × Group interaction ( $F_{(1,102)} = 4.687, p < 0.05$ ), and a Time × Dose interaction ( $F_{(2,102)} = 2.24, p < 0.05$ ). In the heroin addict groups, two-way ANOVA revealed a significant effect of Time ( $F_{(1,49)} = 8.17, p < 0.05$ ) and a Time × Dose interaction ( $F_{(2,49)} = 2.68, p < 0.05$ ). In within-group comparisons, 150 µg clonidine, but not 75 µg clonidine or placebo, improved decision-making performance ( $p < 0.05$ ). In all three subgroups of normal controls, no significant difference was found between pretreatment and post-treatment ( $p > 0.05$ ).

### 150 µg clonidine decreased blood pressure of heroin addicts

Fig. 2 showed changes in systolic blood pressure (SBP), diastolic blood pressure (DBP) and heart rate (HR) after clonidine or

**Table 2.** Self-reported impulsivity on the BIS-II in heroin addicts and normal controls.

| Scale/subscale                | Control groups      |                             |                              | Heroin groups       |                             |                              |
|-------------------------------|---------------------|-----------------------------|------------------------------|---------------------|-----------------------------|------------------------------|
|                               | Placebo<br>(n = 20) | 75 µg clonidine<br>(n = 18) | 150 µg clonidine<br>(n = 18) | Placebo<br>(n = 17) | 75 µg clonidine<br>(n = 18) | 150 µg clonidine<br>(n = 18) |
| BIS: Attention <sup>a</sup>   | 14.90 (3.24)        | 14.56 (3.76)                | 15.33 (3.87)                 | 17.18 (2.70)        | 17.78 (2.10)                | 18.67 (2.50)                 |
| BIS: Motor <sup>a</sup>       | 21.35 (3.76)        | 22.22 (3.66)                | 21.06 (4.33)                 | 25.00 (3.14)        | 24.28 (2.52)                | 23.83 (3.24)                 |
| BIS: Nonplanning <sup>a</sup> | 21.60 (4.90)        | 23.39 (4.22)                | 22.89 (4.42)                 | 28.88 (4.81)        | 28.28 (4.42)                | 28.17 (3.54)                 |
| BIS: Total <sup>a</sup>       | 58.25(10.29)        | 60.17 (7.33)                | 59.28 (8.45)                 | 71.77 (8.53)        | 70.33 (6.86)                | 70.67 (6.62)                 |

Values are expressed as mean (S.D.).

<sup>a</sup>Difference between heroin addicts and normal controls.

doi:10.1371/journal.pone.0029084.t002

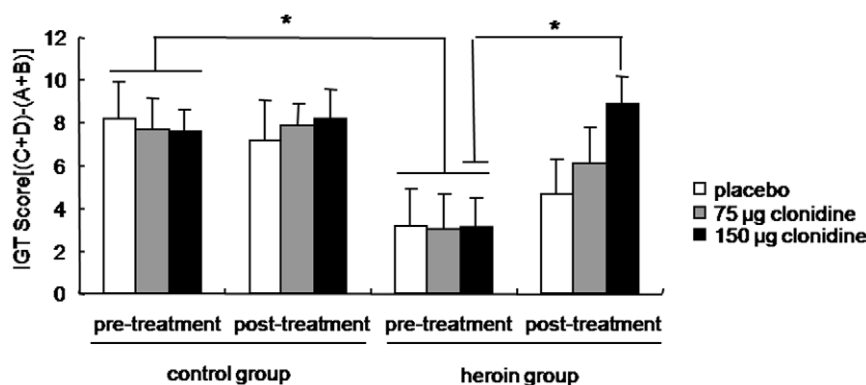

**Figure 1. Effects of clonidine on the Iowa Gambling Task in heroin addicts assessed using the original version of IGT net scores [(C+D)-(A+B)].** Data are expressed as mean  $\pm$  SEM. Positive net scores reflect advantageous (non-impaired performance), while negative net scores reflect disadvantageous (impaired performance). A significant difference was found between heroin addicts and normal controls. A dose of 150  $\mu$ g clonidine significantly increased IGT net scores in heroin addicts. \* $p < 0.05$ , significant difference from placebo subgroup in *post hoc* *t*-test. doi:10.1371/journal.pone.0029084.g001

placebo treatment in the heroin and control groups. There was no significant difference in baseline SBP, DBP, or HR between groups ( $p > 0.05$ ). Both doses of clonidine decreased SBP of heroin addicts and control subjects (Time effect: ( $F_{(3,306)} = 40.01, p < 0.05$ ; Time  $\times$  Dose interaction: ( $F_{(6,306)} = 7.17, p < 0.05$ ) (Fig. 2A), but not heart rate ( $p > 0.05$ ; Fig. 2C). 150  $\mu$ g clonidine significantly decreased DBP in both control and heroin groups, but 75  $\mu$ g clonidine only reduced DBP in the control group (Time effect: ( $F_{(3,309)} = 42.07, p < 0.05$ ), Time  $\times$  Group interaction ( $F_{(3,309)} = 5.09, p < 0.05$ ), Time  $\times$  Dose interaction ( $F_{(6,309)} = 8.77, p < 0.05$ ) (Fig. 2B).

## Discussion

**The present placebo-controlled, double-blind study demonstrated that 150  $\mu$ g clonidine improved the impaired decision-making performance in abstinent heroin addicts, which was assessed with the original card version of the IGT.** The impulsive decision-making in heroin addicts were consistent with previous studies in opiate dependents using IGT, Game of Dice Task [23] and Cambridge Gambling Task [24,25]. **The lower dose of 75  $\mu$ g clonidine did not show the significant effect on the decision-making ability in heroin abusers. But the pharmacokinetics study has found the cumulative concentration of chronic dosing with 75  $\mu$ g clonidine [26], which suggested this lower dose of clonidine could be effective to enhance the decision-making ability.**

Studies using neuroimaging and brain lesion technologies have implicated that prefrontal cortex (PFC), medial frontal cortex and basal ganglia in controlling impulsive decision making [27]. Various neurotransmitter systems, including norepinephrine, dopamine and serotonin, in the above brain regions modulated neural processes underlying the decision-making [28]. Decreased activation in the specific PFC areas have been found in addicts [13,29,30].

It has been suggested that stimulation of the alpha-2 adrenoceptor improved PFC function in animals [31,32]. For example, intra-PFC infusion of the alpha-2 agonist guanfacine in aged monkeys [20] or rats [33] improved working memory performance. Conversely, infusion of the alpha-2 antagonist yohimbine into the PFC in monkeys impaired working memory performance [34]. Moreover, acute yohimbine increased laboratory-measured impulsivity [18,35]. In the present study, the improvement of decision-making performance in abstinent heroin

addicts by 150  $\mu$ g clonidine may attribute to presynaptic alpha-2 receptor activation and the subsequent decreased norepinephrine release in the PFC.

Some limitations of our present study should be noted. First, retest of IGT may produce a practice effect. However, the decision-making capacity of drug addicts is similar to that of patients with ventromedial prefrontal cortex (vmPFC) damage [36], who did not improve their performance on the gambling task when tested repeatedly [37]. Moreover, abnormalities in the vmPFC region were found in cocaine addicts [38]. **Second, our present results did not show the low dose of clonidine significantly improved the decision-making ability, which may attribute to the small sample size. The further research work should enlarge the number of subjects.** The third potential limitation is that the noradrenergic effects of clonidine were not measured directly in this preliminary study. However, both the 75  $\mu$ g and 150  $\mu$ g clonidine decreased blood pressure significantly. It has been shown that clonidine decreased the norepinephrine metabolites and altered working memory performance [39,40] at doses similar to those used here. Clonidine could influence other transmitter systems through alpha-2 receptors [41,42]. Routine monitoring of blood pressure was necessary to confirm safety in heroin addicts in future study because of the significant reduction of blood pressure by clonidine.

In conclusion, we found that abstinent heroin addicts perform more impulsively, and clonidine may play a potential therapeutic role in improving the impaired decision-making performance. These findings have important implications for behavioral and pharmacological interventions targeting impulsivity in heroin addiction.

## Materials and Methods

The study was approved by the Peking University Research Ethics Board. All participants provided written informed consent and received monetary compensation for taking part in the study.

## Participants

Eighty-six male abstinent heroin addicts were recruited from the Yichang Compulsory Rehabilitation Center, Hubei province, China. Sixty-one normal subjects were recruited through advertisements followed by telephone screening. All subjects were 20 to 40 years old. The study's procedures and risks were explained and discussed thoroughly, and written informed consent was obtained

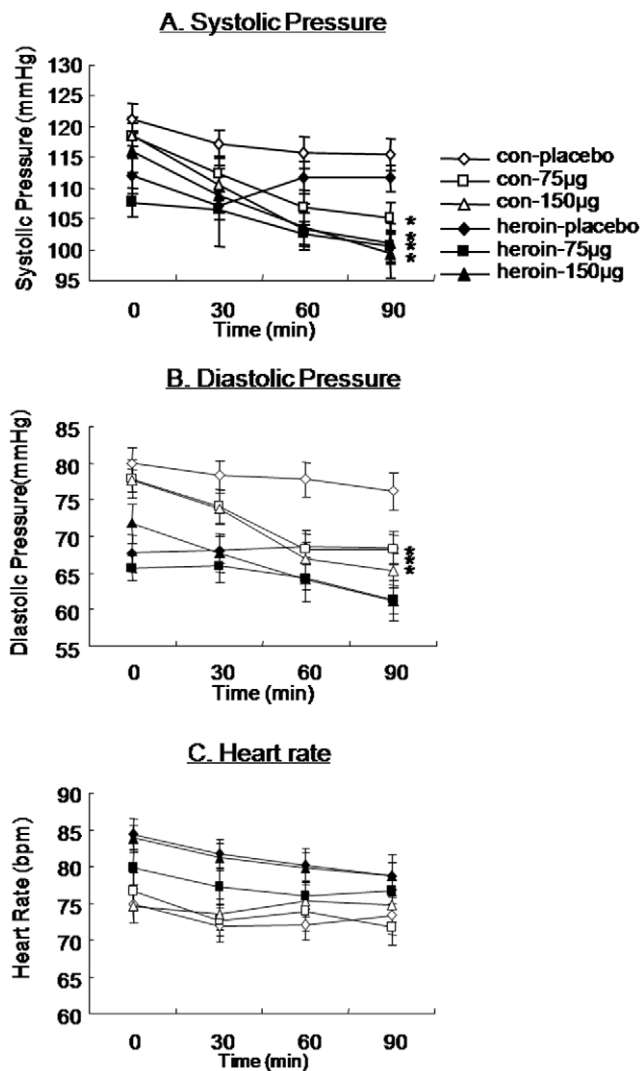

**Figure 2. Effects of clonidine on blood pressure and heart rate in heroin addicts.** (A) Systolic blood pressure. Treatment with 75 µg and 150 µg clonidine significantly decreased systolic blood pressure at 90 min in both heroin addicts and normal controls. (B) Diastolic blood pressure. Treatment with 150 µg clonidine significantly decreased diastolic blood pressure at 90 min in both heroin addicts and normal controls. Treatment with 75 µg clonidine significantly decreased diastolic blood pressure at 90 min in normal controls. (C) Heart rate. No effect of clonidine was found on heart rate. \* $p < 0.05$ , compared with baseline in post hoc t-test. Data are expressed as mean  $\pm$  SEM. doi:10.1371/journal.pone.0029084.g002

from subjects before study participation. Prior to enrollment, the addicts were screened using the Structured Clinical Interview for the *Diagnostic and Statistical Manual of Mental Disorders*, 4th edition (DSM-IV) [43] and underwent a thorough interview about their medical history and a physical examination (electrocardiogram, blood pressure, heart rate). Exclusion criteria included a history of head injury or a self-reported history of severe mental illness or psychosis neurological disorders. Heroin addicts needed to be drug free for at least 1 month with no current medical illness requiring pharmacologic treatment or any other substance abuse with the exception of heroin and nicotine (assessed by urine drug screen and self-report). They have been treated with methadone for one week, and the dose regimen was established basing on their body weight, the doses they took before and severity of withdrawal syndrome, etc.

## Questionnaires and neuropsychological measures

**Demographic characteristics.** Demographic characteristics of the subjects were collected upon arrival, including gender, age, education years, heroin use time and dose, time of last drug use, and smoking status.

**Hamilton Anxiety Scale.** The 14-item Hamilton Anxiety Scale (HAMA) questionnaire was used to measure anxiety. Items 1–6 and 14 were about psychological anxiety, and items 7–13 were about somatic anxiety [44].

**Beck Depression Inventory.** Depressive symptoms were measured using the 13-item Beck Depression Inventory (BDI). Each of the 13 items measured the presence and severity of depressive symptoms by requiring a self-rating from 0 to 3 [45].

**Barratt Impulsiveness Scale version-11.** The Barratt Impulsiveness Scale (BIS-11) is a validated questionnaire that measures different dimensions of impulsivity [46]. The questionnaire is a 30-item self-report instrument that contains three subscales: motor impulsiveness (e.g., I am restless at the theatre or lectures), attention impulsiveness (e.g., I get easily bored when solving thought problems), and nonplanning impulsiveness (e.g., I spend or charge more than I earn). The Chinese version of the BIS-11 has been shown to have good internal consistency and test-retest reliability [47,48].

**Iowa Gambling Task.** We used the original card version of the IGT to evaluate decision-making performance. The task was administered according to the procedure described by the Iowa group [7,49]. In the task, the disadvantageous decks yield higher immediate rewards but unpredictable and larger delayed punishments, while the advantageous decks provide lower immediate gains but unexpected and smaller future losses. Quality of decision-making was measured by the overall net score, which is obtained by subtracting the number of cards selected from the disadvantageous decks from the advantageous decks  $[(C+D) - (A+B)]$ .

## Blood pressure and heart rate assessment

Systolic and diastolic blood pressure was measured with a 9062D monitor (Baozhong Biotechnology Company, Beijing, China). A pulse sensor was attached to the subject's finger and connected to an SD-700 monitor to provide a continuous measure of pulse [50]. Multiple measures of pulse and blood pressure were monitored for baseline and every 30 min after treatment.

## Procedure

Following recruitment, both the normal participants and heroin addicts were randomly assigned to three groups: placebo, 75 µg and 150 µg clonidine (Changzhou Pharmaceuticals, Jiangsu, China) group. The participants and the experimenters were blind to the study treatment. Each participant attended a testing session at the clinical laboratory at 8:00 am. Upon arrival, the experimental procedure was explained to each participant (Table 3). Following a 15 min adaptation time in which subjects were instructed to relax, each participant completed the questionnaires (HAMA, BDI, BIS) and neuropsychological test (IGT). After baseline testing of blood pressure and heart rate, subjects received placebo, 75 µg clonidine, or 150 µg clonidine orally. Clonidine doses were based on previous studies [51,52]. The decision-making test was repeated 90 min later. Blood pressure and heart rate were monitored every 30 min. Participants were allowed to leave the laboratory when their systolic blood pressure and heart rate returned to baseline levels.

## Statistical analysis

All data were analyzed with SPSS v. 13.0 (Chicago, IL, USA). Demographic characteristics (i.e., age, years of education, duration

**Table 3.** Schedule for laboratory session.

| Time     | Event/activity                                                                                                          |
|----------|-------------------------------------------------------------------------------------------------------------------------|
| 8:00 AM  | Participant arrival, written informed consent given                                                                     |
| 8:15 AM  | Demographic characteristic collection, HAMA, BDI, BIS questionnaire, IGT, online baseline heart rate and blood pressure |
| 8:45 AM  | Clonidine/placebo administration, online baseline heart rate and blood pressure                                         |
| 9:15 AM  | Online baseline heart rate and blood pressure                                                                           |
| 9:45 AM  | Online baseline heart rate and blood pressure                                                                           |
| 10:30 AM | IGT                                                                                                                     |
| 10:45 AM | 10 min relaxation time                                                                                                  |

doi:10.1371/journal.pone.0029084.t003

of heroin use, dose used, and duration of abstinence) and psychiatric symptoms, including anxiety, depression, and impulsivity among groups were compared using one-way analysis of variance (ANOVA). Iowa Gambling Task scores were analyzed by

three-way ANOVA with the between-subjects factors of Group (heroin group *vs.* control group) and Dose (placebo, 75 µg, and 150 µg clonidine) and the within-subjects factor of Time (pretreatment *vs.* post-treatment). In the heroin addict groups, IGT scores were analyzed by two-way ANOVA with the between-subjects factor of Dose (placebo, 75 µg, and 150 µg clonidine) and the within-subjects factor of Time (pretreatment *vs.* post-treatment). Repeated-measures ANOVA with the between-subjects factors of Group (heroin group *vs.* control group) and Dose (placebo, 75 µg, and 150 µg clonidine) and the within-subjects factor of Time (0, 30, 60, and 90 min) were used to analyze systolic blood pressure, diastolic blood pressure and heart rate. *Post hoc* pairwise comparisons were conducted with Fisher's Least Significant Difference (LSD) test. Values of  $p < 0.05$  were considered statistically significant. Means are given with standard deviations.

### Author Contributions

Conceived and designed the experiments: X-LZ JS LL. Performed the experiments: X-LZ G-BW L-YZ L-LS JW PW. Analyzed the data: X-LZ. Wrote the paper: X-LZ G-BW JS LL.

### References

- Economidou D, Pelloux Y, Robbins TW, Dalley JW, Everitt BJ (2009) High impulsivity predicts relapse to cocaine-seeking after punishment-induced abstinence. *Biol Psychiatry* 65: 851–856.
- Allen TJ, Moeller FG, Rhoades HM, Cherek DR (1998) Impulsivity and history of drug dependence. *Drug Alcohol Depend* 50: 137–145.
- Fillmore MT, Rush CR (2002) Impaired inhibitory control of behavior in chronic cocaine users. *Drug Alcohol Depend* 66: 265–273.
- Morgan MJ, Impallomeni LC, Pirona A, Rogers RD (2006) Elevated impulsivity and impaired decision-making in abstinent Ecstasy (MDMA) users compared to polydrug and drug-naïve controls. *Neuropsychopharmacology* 31: 1562–1573.
- Clark L, Robbins TW, Ersche KD, Sahakian BJ (2006) Reflection impulsivity in current and former substance users. *Biol Psychiatry* 60: 515–522.
- Evenden JL (1999) Varieties of impulsivity. *Psychopharmacology (Berl)* 146: 348–361.
- Bechara A, Damasio AR, Damasio H, Anderson SW (1994) Insensitivity to future consequences following damage to human prefrontal cortex. *Cognition* 50: 7–15.
- Brand M, Recknor EC, Grabenhorst F, Bechara A (2007) Decisions under ambiguity and decisions under risk: correlations with executive functions and comparisons of two different gambling tasks with implicit and explicit rules. *J Clin Exp Neuropsychol* 29: 86–99.
- Mintzer MZ, Copersino ML, Stitzer ML (2005) Opioid abuse and cognitive performance. *Drug Alcohol Depend* 78: 225–230.
- Verdejo-Garcia AJ, Perales JC, Perez-Garcia M (2007) Cognitive impulsivity in cocaine and heroin polysubstance abusers. *Addict Behav* 32: 950–966.
- Bechara A, Dolan S, Denburg N, Hindes A, Anderson SW, et al. (2001) Decision-making deficits, linked to a dysfunctional ventromedial prefrontal cortex, revealed in alcohol and stimulant abusers. *Neuropsychologia* 39: 376–389.
- Mazas CA, Finn PR, Steinmetz JE (2000) Decision-making biases, antisocial personality, and early-onset alcoholism. *Alcohol Clin Exp Res* 24: 1036–1040.
- Bolla KI, Eldreth DA, London ED, Kiehl KA, Mouratidis M, et al. (2003) Orbitofrontal cortex dysfunction in abstinent cocaine abusers performing a decision-making task. *Neuroimage* 19: 1085–1094.
- Bolla KI, Eldreth DA, Matochik JA, Cadet JL (2005) Neural substrates of faulty decision-making in abstinent marijuana users. *Neuroimage* 26: 480–492.
- Barraclough DJ, Conroy ML, Lee D (2004) Prefrontal cortex and decision making in a mixed-strategy game. *Nat Neurosci* 7: 404–410.
- Wallis JD (2007) Neuronal mechanisms in prefrontal cortex underlying adaptive choice behavior. *Ann N Y Acad Sci* 1121: 447–460.
- Arnsten AF, Mathew R, Ubrani R, Taylor JR, Li BM (1999) Alpha-1 noradrenergic receptor stimulation impairs prefrontal cortical cognitive function. *Biol Psychiatry* 45: 26–31.
- Swann AC, Birnbaum D, Jagar AA, Dougherty DM, Moeller FG (2005) Acute yohimbine increases laboratory-measured impulsivity in normal subjects. *Biol Psychiatry* 57: 1209–1211.
- Zhang XL, Shi J, Zhao LY, Sun LL, Wang J, et al. (2011) Effects of stress on decision-making deficits in formerly heroin-dependent patients after different durations of abstinence. *Am J Psychiatry* 168: 610–616.
- Arnsten AF, Jentsch JD (1997) The alpha-1 adrenergic agonist, cirazoline, impairs spatial working memory performance in aged monkeys. *Pharmacol Biochem Behav* 58: 55–59.
- Philipsen A, Richter H, Schmahl C, Peters J, Rusch N, et al. (2004) Clonidine in acute aversive inner tension and self-injurious behavior in female patients with borderline personality disorder. *J Clin Psychiatry* 65: 1414–1419.
- Watanabe T, Inagaki Y, Ishibe Y (2006) Clonidine premedication effects on inhaled induction with sevoflurane in adults: a prospective, double-blind, randomized study. *Acta Anaesthesiol Scand* 50: 180–187.
- Brand M, Roth-Bauer M, Driessen M, Markowitsch HJ (2008) Executive functions and risky decision-making in patients with opiate dependence. *Drug Alcohol Depend* 97: 64–72.
- Ersche KD, Roiser JP, Clark L, London M, Robbins TW, et al. (2005) Punishment induces risky decision-making in methadone-maintained opiate users but not in heroin users or healthy volunteers. *Neuropsychopharmacology* 30: 2115–2124.
- Passetti F, Clark L, Mehta MA, Joyce E, King M (2008) Neuropsychological predictors of clinical outcome in opiate addiction. *Drug Alcohol Depend* 94: 82–91.
- Anavekar SN, Howes LG, Jarrott B, Syrjanen M, Conway EL, et al. (1989) Pharmacokinetics and antihypertensive effects of low dose clonidine during chronic therapy. *J Clin Pharmacol* 29: 321–326.
- Kim S, Lee D (2010) Prefrontal Cortex and Impulsive Decision Making. *Biol Psychiatry* 2010: 20.
- Verdejo-Garcia A, Bechara A (2009) A somatic marker theory of addiction. *Neuropharmacology* 56 Suppl 1: 48–62.
- Paulus MP, Hozack NE, Zauscher BE, Frank L, Brown GG, et al. (2002) Behavioral and functional neuroimaging evidence for prefrontal dysfunction in methamphetamine-dependent subjects. *Neuropsychopharmacology* 26: 53–63.
- Paulus MP, Hozack N, Frank L, Brown GG, Schuckit MA (2003) Decision making by methamphetamine-dependent subjects is associated with error-rate-independent decrease in prefrontal and parietal activation. *Biol Psychiatry* 53: 65–74.
- Arnsten AF, Li BM (2005) Neurobiology of executive functions: catecholamine influences on prefrontal cortical functions. *Biol Psychiatry* 57: 1377–1384.
- Arnsten AF, Steere JC, Hunt RD (1996) The contribution of alpha 2-noradrenergic mechanisms of prefrontal cortical cognitive function. Potential significance for attention-deficit hyperactivity disorder. *Arch Gen Psychiatry* 53: 448–455.
- Carlson S, Tamila H, Rama P, Mecke E, Pertovaara A (1992) Effects of medetomidine, an alpha-2 adrenoceptor agonist, and atipamezole, an alpha-2 antagonist, on spatial memory performance in adult and aged rats. *Behav Neural Biol* 58: 113–119.
- Li BM, Mei ZT (1994) Delayed-response deficit induced by local injection of the alpha 2-adrenergic antagonist yohimbine into the dorsolateral prefrontal cortex in young adult monkeys. *Behav Neural Biol* 62: 134–139.
- Sun H, Green TA, Theobald DE, Birnbaum SG, Graham DL, et al. (2011) Yohimbine increases impulsivity through activation of cAMP response element binding in the orbitofrontal cortex. *Biol Psychiatry* 67: 649–656.
- Bechara A (2005) Decision making, impulse control and loss of willpower to resist drugs: a neurocognitive perspective. *Nat Neurosci* 8: 1458–1463.
- Bechara A, Damasio H, Damasio AR (2000) Emotion, decision making and the orbitofrontal cortex. *Cereb Cortex* 10: 295–307.
- Volkow ND, Fowler JS, Wang GJ (2004) The addicted human brain viewed in the light of imaging studies: brain circuits and treatment strategies. *Neuropharmacology* 47 Suppl 1: 3–13.

39. Riekkinen M, Riekkinen P, Jr. (1999) Alpha2-adrenergic agonist clonidine for improving spatial working memory in Parkinson's disease. *J Clin Psychopharmacol* 19: 444–449.
40. Riekkinen M, Jakala P, Kejonen K, Riekkinen P, Jr. (1999) The alpha2 agonist, clonidine, improves spatial working performance in Parkinson's disease. *Neuroscience* 92: 983–989.
41. Kawasaki H, Takasaki K (1986) Pharmacological characterization of presynaptic alpha-adrenoceptors in the modulation of the 5-hydroxytryptamine release from vascular adrenergic nerves in the rat. *Jpn J Pharmacol* 42: 561–570.
42. Meana JJ, Herrera-Marschitz M, Gojny M, Silveira R (1997) Modulation of catecholamine release by alpha 2-adrenoceptors and 11-imidazoline receptors in rat brain. *Brain Res* 744: 216–226.
43. American Psychiatric Association (1994) Diagnostic and statistical manual of mental disorder, 4th ed. Washington, DC: American Psychiatric Association.
44. Hamilton M (1959) The assessment of anxiety states by rating. *Br J Med Psychol* 32: 50–55.
45. Beck AT, Steer RA, Ball R, Ranieri W (1996) Comparison of Beck Depression Inventories -IA and -II in psychiatric outpatients. *J Pers Assess* 67: 588–597.
46. Patton JH, Stanford MS, Barratt ES (1995) Factor structure of the Barratt impulsiveness scale. *J Clin Psychol* 51: 768–774.
47. Yang HQYS, Zhu XZ (2007) The Chinese Version of the Barratt Impulsiveness Scale 11th Version (BIS - 11) in College Students: Its Reliability and Validity. *Chinese Mental Health Journal* 21: 3.
48. Yang HQYS, Zhu XZ, Auerbach RP, Abela JRZ, Xi T (2007) The Chinese Version of the Barratt Impulsiveness Scale, 11th Version (BIS- 11) in Adolescents: Its Reliability and Validity. *Chinese Journal of Clinical Psychology* 15: 4.
49. Bechara A, Tranel D, Damasio H (2000) Characterization of the decision-making deficit of patients with ventromedial prefrontal cortex lesions. *Brain* 123(Pt 11): 2189–2202.
50. Shi J, Zhao LY, Epstein DH, Zhang XL, Lu L (2007) Long-term methadone maintenance reduces protracted symptoms of heroin abstinence and cue-induced craving in Chinese heroin abusers. *Pharmacol Biochem Behav* 87: 141–145.
51. Nieuwenhuis S, van Nieuwpoort IC, Veltman DJ, Drent ML (2007) Effects of the noradrenergic agonist clonidine on temporal and spatial attention. *Psychopharmacology (Berl)* 193: 261–269.
52. Dobrydnjov I, Axelsson K, Berggren L, Samarutel J, Holmstrom B (2004) Intrathecal and oral clonidine as prophylaxis for postoperative alcohol withdrawal syndrome: a randomized double-blinded study. *Anesth Analg* 98: 738–744, table of contents.
